# Supplementary material for: A high-density 4-vinylpyridine membrane for rapid purification of antibodies
Source: Royal Society of Chemistry journal article supplement (doi:10.1039/d4ay02100b), 2025-01-01
Supplement: d4ay02100b1.pdf [file d4ay02100b1.pdf]

### **S1. Preparation and evaluation of the PP-HEMA membrane**

To synthesize the PVDF-HEMA membrane, a fixed molar ratio of CuBr<sub>2</sub>/PMDETA/L-Asc/EBIB was designed and experiments were performed to optimize the following parameters: 1) the molar ratio of HEMA/MBA (3:1, 2:1, 1:1, 1:2, 1:3); 2) the total concentration of monomers including HEMA and MBA (0.08 to 0.44 mM); 3) the reaction time (2 to 10 h). The following experiments were conducted: 500 μL of HSA (50 μg/mL in 12 mM PBS) was consecutively flowed through the membrane, and the eluate was collected for BCA assay for the recovery calculations.

### **S2. Preparation of the PVDF-HEMA-co-4-vinylpyridine membrane**

To synthesize the PVDF-HEMA-co-4-vinylpyridine membrane, a fixed molar ratio of CuBr<sub>2</sub>/PMDETA/L-Asc/EBIB was designed and experiments were performed to optimize the following parameters: 1) the amount of 4-vinylpyridine monomer (0.05 to 0.15 mM); 2) the reaction time (1 to 8 h). The evaluation of the indicators was mainly based on the recovery (%) of rituximab, calculated as  $(1 - (\text{BCA value of analyte in eluent} / \text{BCA value of analyte in standard working solution})) \times 100\%$ .

**Table S1.** Composition of the polymerization mixtures for preparing the PVDF-HEMA membrane.

| No.        | Monomers<br>(%, w/w) |       | Modification reagent<br>(%, w/w) |                                 |       | Reducing<br>Agent<br>(%) | Monomers/<br>Modification<br>reagent<br>(%, w/w) | Preparation<br>Time<br>(h) | CRP<br>Recovery<br>(%) |
|------------|----------------------|-------|----------------------------------|---------------------------------|-------|--------------------------|--------------------------------------------------|----------------------------|------------------------|
|            | HEMA                 | MBA   | EBIB                             | CuBr <sub>2</sub> and<br>PMDETA | DMF   | L-Asc                    |                                                  |                            |                        |
| 1          | 76.69                | 28.31 | 2.53                             | 0.69                            | 84.82 | 47.32                    | 17.65: 82.35                                     | 6                          | 16.5                   |
| 2          | 62.80                | 37.20 | 2.53                             | 0.69                            | 84.82 | 47.32                    | 17.65:82.35                                      | 6                          | 65.1                   |
| 3          | 45.77                | 54.23 | 2.53                             | 0.69                            | 84.82 | 47.32                    | 17.65:82.35                                      | 6                          | 93.8                   |
| 4          | 29.68                | 70.32 | 2.53                             | 0.69                            | 84.82 | 47.32                    | 17.65:82.35                                      | 6                          | 80.4                   |
| 5          | 21.96                | 78.04 | 2.53                             | 0.69                            | 84.82 | 47.32                    | 17.65:82.35                                      | 6                          | 63.1                   |
| 6          | 45.77                | 54.23 | 2.53                             | 0.69                            | 84.82 | 47.32                    | 5.77:94.23                                       | 6                          | 20.4                   |
| 7          | 45.77                | 54.23 | 2.53                             | 0.69                            | 84.82 | 47.32                    | 8.41:91.59                                       | 6                          | 40.4                   |
| 8          | 45.77                | 54.23 | 2.53                             | 0.69                            | 84.82 | 47.32                    | 13.68:86.72                                      | 6                          | 55.4                   |
| 9          | 45.77                | 54.23 | 2.53                             | 0.69                            | 84.82 | 47.32                    | 17.65:82.35                                      | 6                          | 32.4                   |
| 10         | 45.77                | 54.23 | 2.53                             | 0.69                            | 84.82 | 47.32                    | 21.61:78.39                                      | 6                          | 54.7                   |
| 11         | 45.77                | 54.23 | 2.53                             | 0.69                            | 84.82 | 47.32                    | 25.20:74.80                                      | 6                          | 60.7                   |
| 12         | 45.77                | 54.23 | 2.53                             | 0.69                            | 84.82 | 47.32                    | 17.65:82.35                                      | 2                          | 20.4                   |
| 13         | 45.77                | 54.23 | 2.53                             | 0.69                            | 84.82 | 47.32                    | 17.65:82.35                                      | 4                          | 53.7                   |
| <b>14*</b> | 45.77                | 54.23 | 2.53                             | 0.69                            | 84.82 | 47.32                    | 17.65:82.35                                      | 6                          | 94.7                   |
| 15         | 45.77                | 54.23 | 2.53                             | 0.69                            | 84.82 | 47.32                    | 17.65:82.35                                      | 8                          | 86.4                   |
| 16         | 45.77                | 54.23 | 2.53                             | 0.69                            | 84.82 | 47.32                    | 17.65:82.35                                      | 10                         | 91.1                   |

\*: the condition of No. 14 was considered as the optimum; w/w: weight to weight ratio.

**Table S2.** Composition of the polymerization mixtures for preparing the MPC polymer brush modified PVDF-HEMA-*co*-4-vinylpyridine membrane .

| No. | Monomers (%)    |                              | Reducing agent (% w/w) |       | Preparation Time (h) | Rituximab Recovery (%) |
|-----|-----------------|------------------------------|------------------------|-------|----------------------|------------------------|
|     | 4-vinylpyridine | CuBr <sub>2</sub> and PMDETA | DMF                    | L-Asc |                      |                        |
| 1   | 16.33           | 1.50                         | 86.86                  | 2.56  | 8                    | 80.5                   |
| 2*  | 16.33           | 1.50                         | 96.74                  | 2.56  | 8                    | 93.5                   |
| 3   | 16.33           | 1.50                         | 80.65                  | 2.56  | 8                    | 76.5                   |
| 4   | 5.45            | 1.50                         | 96.74                  | 1.26  | 8                    | 38.6                   |
| 5   | 10.24           | 1.50                         | 96.74                  | 1.26  | 8                    | 64.2                   |
| 6   | 16.33           | 1.50                         | 96.74                  | 2.56  | 8                    | 92.5                   |
| 7   | 20.08           | 1.50                         | 96.74                  | 1.26  | 8                    | 79.6                   |
| 8   | 16.33           | 1.50                         | 96.74                  | 1.26  | 8                    | 94.6                   |
| 9   | 16.33           | 1.50                         | 96.74                  | 1.26  | 4                    | 75.6                   |
| 10  | 16.33           | 1.50                         | 96.74                  | 1.26  | 6                    | 64.6                   |
| 11  | 16.33           | 1.50                         | 96.74                  | 1.26  | 8                    | 70.6                   |
| 12  | 16.33           | 1.50                         | 96.74                  | 1.26  | 10                   | 77.6                   |
| 13  | 16.33           | 1.50                         | 96.74                  | 1.26  | 12                   | 89.6                   |

\*: the condition of No. 2 was considered as the optimum; w/w: weight to weight ratio; -: the membrane surface structure became too hard to be rolled.

**Table S3.** Comparison of XPS results for different membranes.

| Atomic composition percentage (%)     | C     | O     | N    | Br   |
|---------------------------------------|-------|-------|------|------|
| PVDF                                  | 98.15 | 1.68  | 0.17 | -    |
| PVDF-HEMA                             | 70.04 | 29.64 | 0.22 | 0.10 |
| PVDF-HEMA- <i>co</i> -4-vinylpyridine | 72.73 | 22.86 | 4.34 | 0.07 |

-: cannot be detected
